# Supplementary material for: Antimalarial Activities of Hydromethanolic Crude Extract and Chloroform Fraction of Gardenia ternifolia Leaves in Plasmodium berghei Infected Mice
Source: Evid Based Complement Alternat Med. 2020 Dec 29;2020:6674002. doi: 10.1155/2020/6674002 (PMC7785367; doi:10.1155/2020/6674002)
Supplement: Supplementary Materials — (1) Raw data: in vivo antimalarial effect of Gardenia ternifolia chemosuppressive data. (2) List of supplies, chemicals, reagents, and equipment used in our research. [file 6674002.f1.zip]

Archive with 2 entries (2 files):
- 6674002.f1/List of supplies.docx
- 6674002.f1/Raw data.docx
